# Supplementary material for: Comparative Efficacy and Safety of Janus Kinase Inhibitors Used in Alopecia Areata: A Systematic Review and Meta-analysis
Source: PubMed Central journal article supplement — Acta Derm Venereol. 2023 Jan 25;103:4536. doi: 10.2340/actadv.v103.4536 (PMC10391778; doi:10.2340/actadv.v103.4536), 2023-01-25

Supplementary material has been published as submitted. It has not been copyedited, typeset or checked for scientific content by Acta Dermato-Venereologica

Supplemental Figure 1: Result of meta-analysis for SALT30, regarding treatment with brepocitinib and ritlecitinib.

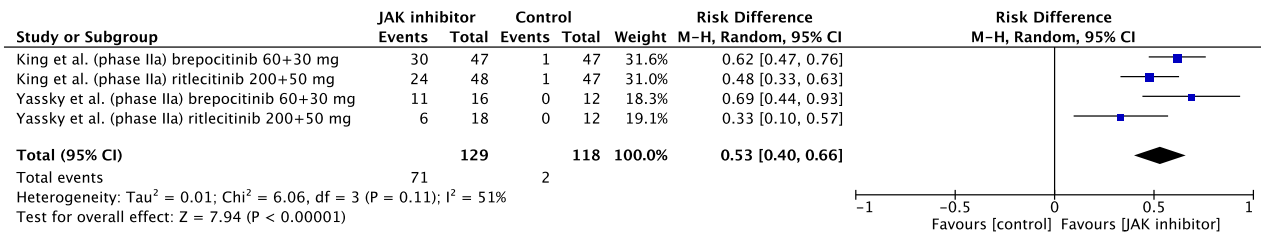

Supplemental Figure 2: Result of meta-analysis for SALT50, regarding treatment with baricitinib, brepocitinib and ritlecitinib.

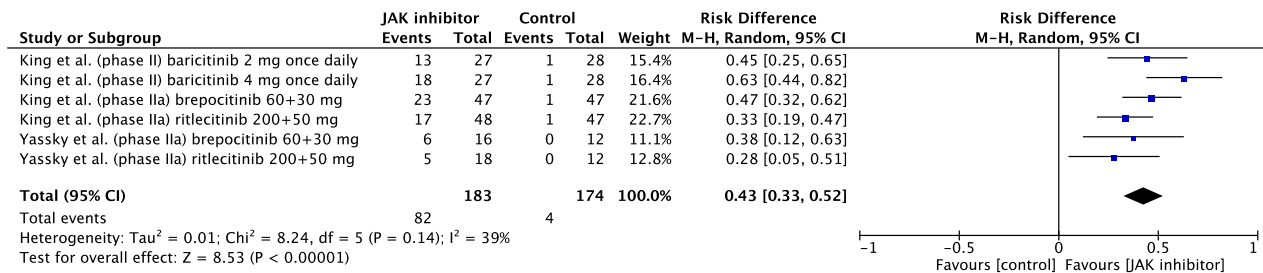

Supplemental Figure 3: Result of meta-analysis for SALT75, regarding treatment with baricitinib, brepocitinib and ritlecitinib.

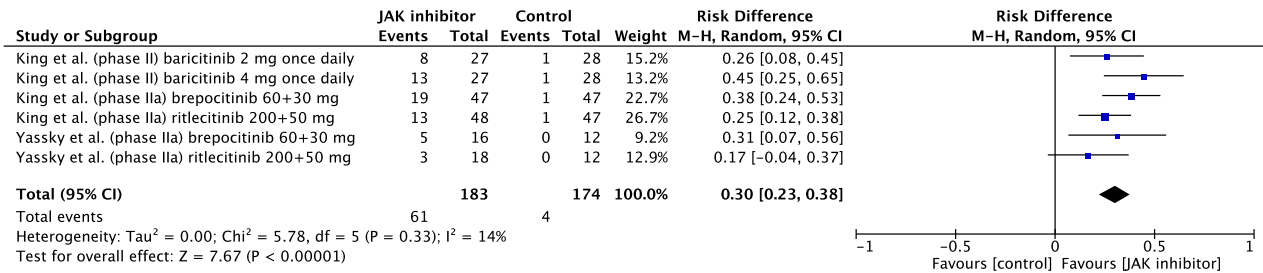

Supplemental Figure 4: Result of meta-analysis for SALT90, regarding treatment with baricitinib, brepocitinib and ritlecitinib.

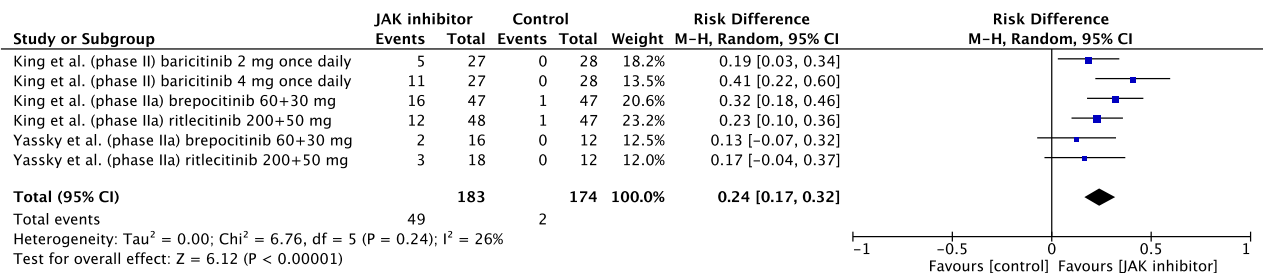

Supplemental Figure 5: Result of meta-analysis for SALT100, regarding treatment with baricitinib, brepocitinib and ritlecitinib.

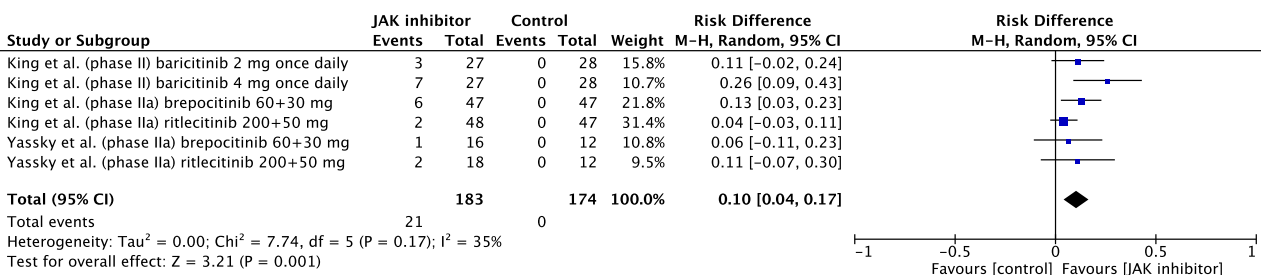

Supplemental Figure 6: Result of meta-analysis for SALT50, regarding treatment with CTP-543 (deuruxolitinib), and baricitinib.

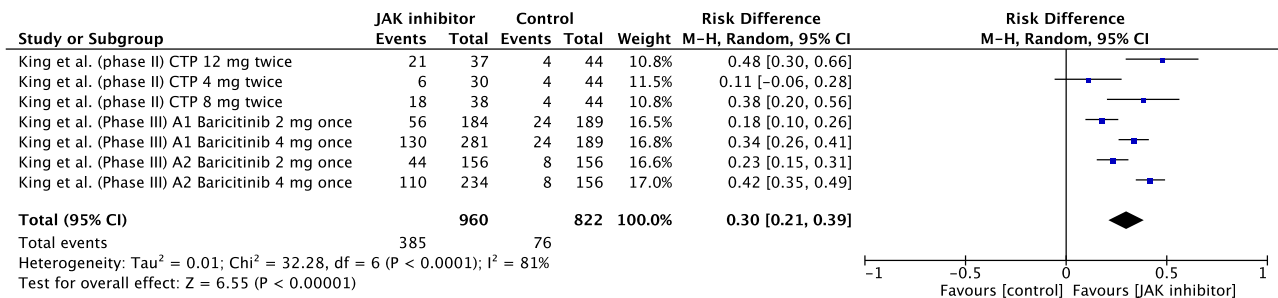

Supplemental Figure 7: Result of meta-analysis for SALT75, regarding treatment with CTP-543 (deuruxolitinib), and baricitinib.

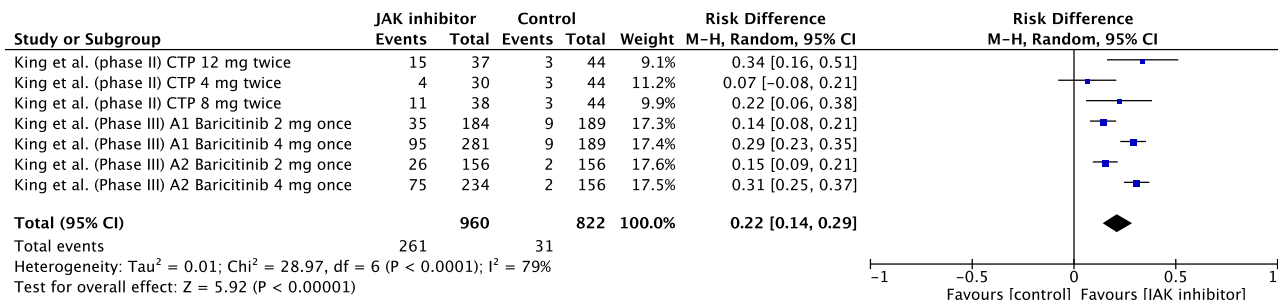

Supplemental Figure 8: Result of meta-analysis for SALT90, regarding treatment with CTP-543 (deuruxolitinib), and baricitinib.

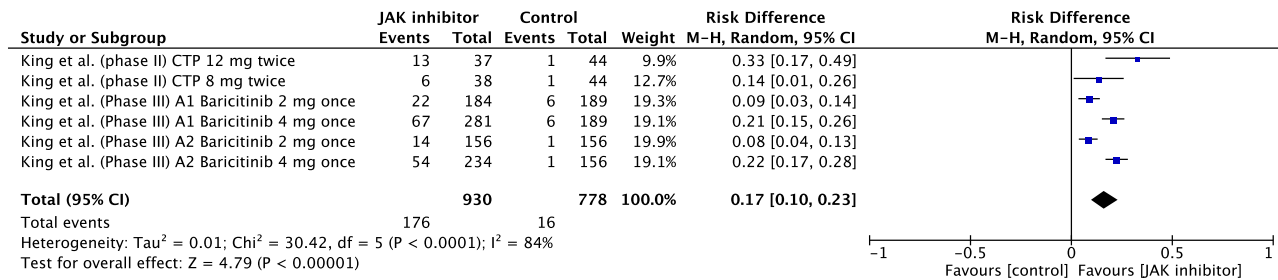

Supplement: ActaDV-103-4536-s1.pdf [file ActaDV-103-4536-s1.pdf]
